# Supplementary material
Source: PubMed Central journal article supplement (PMC3407387)
Supplement: Supp_Data.pdf [file Supp_Data.pdf]

## Supplementary Data

SUPPLEMENTARY TABLE S1. POLYMERASE CHAIN REACTION PRIMER SEQUENCES

| <i>Gene name</i> | <i>Forward primer</i>    | <i>Reverse primer</i>     |
|------------------|--------------------------|---------------------------|
| <i>Slc5a5</i>    | CGCTGCTTGTGTTGGACATTTTTC | CCCAGAGCCCCGTAATAGAGATAG  |
| <i>Actb</i>      | AGCCATGTACGTAGCCATCC     | TGTGGTGGTGAAGCTGTAGC      |
| <i>Nkx2-1</i>    | ACCTTACCAGGACACCATGC     | TACTTCTGCTGCTTGAAGCG      |
| <i>Foxe1</i>     | ATGTACGCCGGGTAGGTGGA     | CAGCTACATCGCACTCATCG      |
| <i>Pax8</i>      | CCATGGCTGTGTAAGCAAGA     | GTTGCGTCCCAGAGGTGTAT      |
| <i>Slc26a4</i>   | TGCTGACTTCATTGCTGGGTTAC  | AATCCAGAGAAGACGTTGCTTATCC |

SUPPLEMENTARY TABLE S2. GENES REGULATED UNDER PROPYLTHIOURACIL TREATMENT

| <i>Gene name</i>           | <i>Synonym</i>        | <i>Fold change</i> | <i>Description</i>                                           |
|----------------------------|-----------------------|--------------------|--------------------------------------------------------------|
| <b>Upregulated genes</b>   |                       |                    |                                                              |
| <i>Slc5a5</i>              | <i>Nis</i>            | 5.66               | Solute carrier family 5 (sodium/iodide symporter), member 5  |
| <i>Csn1s2a</i>             | <i>Csng</i>           | 5.37               | Casein alpha s2-like A                                       |
| <i>Nxn1</i>                | <i>Txnl6</i>          | 3.81               | Nucleoredoxin-like 1                                         |
| <i>Me1</i>                 | <i>MOD1</i>           | 3.75               | Malic enzyme 1, NADP(+)-dependent, cytosolic                 |
| <i>Bhlhe22</i>             | <i>Bhlhb5</i>         | 3.35               | Basic helix-loop-helix family, member e22                    |
| <i>Gpr50</i>               | <i>H9</i>             | 3.25               | G protein-coupled receptor 50                                |
| <i>Gcg</i>                 | <i>GLP-1</i>          | 3.06               | Glucagon                                                     |
| <i>Vash2</i>               | <i>RGD1564105</i>     | 2.98               | Vasohibin 2                                                  |
| <i>E2f1</i>                | —                     | 2.94               | E2F transcription factor 1                                   |
| <i>Tfrc</i>                | <i>Trfr</i>           | 2.76               | Transferrin receptor                                         |
| <i>Cdc6</i>                | —                     | 2.76               | Cell division cycle-6 homolog ( <i>S. cerevisiae</i> )       |
| <i>Sla</i>                 | <i>Slap1</i>          | 2.75               | src-like adaptor                                             |
| <b>Downregulated genes</b> |                       |                    |                                                              |
| <i>Krtap14l</i>            | <i>Krtap14</i>        | 0.11               | Similar to keratin-associated protein 13-1                   |
| <i>Cryab</i>               | <i>AACRYA</i>         | 0.18               | Crystallin, alpha B                                          |
| <i>Defb1</i>               | —                     | 0.18               | Defensin-beta 1                                              |
| <i>Skint4</i>              | <i>RGD1566327</i>     | 0.23               | Similar to Butyrophilin subfamily 1 member A1 precursor (BT) |
| <i>Olr88</i>               | —                     | 0.25               | Olfactory receptor Olr88                                     |
| <i>Sat1l</i>               | <i>RGD1565932</i>     | 0.29               | Similar to spermidine/spermine N1-acetyl transferase         |
| <i>LOC688997</i>           | —                     | 0.29               | Similar to Spetex-2F protein                                 |
| <i>Gprc5a</i>              | <i>MGC156777#Rai3</i> | 0.3                | G protein-coupled receptor, family C, group 5, member A      |
| <i>Sorc1</i>               | —                     | 0.32               | Similar to SORCS receptor 1                                  |
| <i>RGD1565209</i>          | —                     | 0.32               | Similar to kinesin family member 25 isoform 1                |
| <i>Plau</i>                | <i>MGC124931#UPAM</i> | 0.33               | Plasminogen activator, urokinase                             |
| <i>RGD1563747</i>          | —                     | 0.34               | Similar to double homeobox, 4                                |

SUPPLEMENTARY TABLE S3. GENES REGULATED UNDER METHIMAZOLE TREATMENT

| Gene name           | Synonym              | Fold change | Description                                           |
|---------------------|----------------------|-------------|-------------------------------------------------------|
| Upregulated genes   |                      |             |                                                       |
| <i>RGD1564344</i>   | —                    | 11.1        | Similar to CDNA sequence BC027344                     |
| <i>Nqo1</i>         | <i>Dia4#MGC93075</i> | 4.12        | NAD(P)H dehydrogenase, quinone 1                      |
| <i>Hyal5</i>        | <i>MGC108951</i>     | 4.03        | Hyaluronoglucosaminidase 5                            |
| <i>Olr35</i>        | —                    | 3.81        | Olfactory receptor 35                                 |
| <i>Aox1</i>         | —                    | 3.74        | Aldehyde oxidase 1                                    |
| <i>Pcdh8</i>        | <i>Arcadlin</i>      | 3.24        | Protocadherin 8                                       |
| <i>Pir</i>          | <i>MGC109484</i>     | 3.03        | Pirin (iron-binding nuclear protein)                  |
| <i>Me1</i>          | <i>MOD1</i>          | 2.66        | Malic enzyme 1, NADP(+)-dependent, cytosolic          |
| <i>Sdf211</i>       | —                    | 2.63        | Stromal cell-derived factor 2-like 1                  |
| <i>Osgin1</i>       | <i>Ok138</i>         | 2.57        | Oxidative stress-induced growth inhibitor 1           |
| <i>Pdcl2</i>        | <i>RGD1559712</i>    | 2.57        | Phosducin-like 2                                      |
| <i>Tcp10b</i>       | —                    | 2.46        | t-complex protein 10b                                 |
| Downregulated genes |                      |             |                                                       |
| <i>Krtap14l</i>     | <i>Krtap14</i>       | 0.06        | Keratin-associated protein 14-like                    |
| <i>Olr88</i>        | —                    | 0.12        | Olfactory receptor 88                                 |
| <i>Skint4</i>       | <i>RGD1566327</i>    | 0.17        | Selection and upkeep of intraepithelial T cells 4     |
| <i>Cdk14</i>        | —                    | 0.19        | Cyclin-dependent kinase-like 4                        |
| <i>Pfkfb1</i>       | <i>PFRX#Pfkfb01</i>  | 0.19        | 6-Phosphofructo-2-kinase/fructose-2,6-biphosphatase 1 |
| <i>Satl1</i>        | <i>RGD1565932</i>    | 0.19        | Spermidine/spermine N1-acetyl transferase-like 1      |
| <i>Skap1</i>        | <i>Scap1#Skap55</i>  | 0.2         | src kinase-associated phosphoprotein 1                |
| <i>Rarb</i>         | —                    | 0.21        | Retinoic acid receptor, beta                          |
| <i>Olr1260</i>      | —                    | 0.23        | Olfactory receptor 1260                               |
| <i>Olr584</i>       | —                    | 0.23        | Olfactory receptor 584                                |
| <i>Crb2</i>         | <i>RGD1309368</i>    | 0.23        | Crumbs homolog 2 ( <i>Drosophila</i> )                |
| <i>Sorcs1</i>       | —                    | 0.24        | Sortilin-related VPS10 domain-containing receptor 1   |

SUPPLEMENTARY TABLE S4. GENES REGULATED UNDER BOTH PROPYLTHIOURACIL AND METHIMAZOLE TREATMENT

| Gene name         | Synonym                             | Fold change |      | Description                                                                                          |
|-------------------|-------------------------------------|-------------|------|------------------------------------------------------------------------------------------------------|
|                   |                                     | PTU         | MMI  |                                                                                                      |
| Upregulated genes |                                     |             |      |                                                                                                      |
| <i>Nqo1</i>       | <i>Dia4#MGC93075</i>                | 2.03        | 4.12 | NAD(P)H dehydrogenase, quinone 1                                                                     |
| <i>Gsta3</i>      | <i>Gsta1#Gsta5#MGC112704#Yc1</i>    | 2.79        | 3.47 | Glutathione S-transferase A3                                                                         |
| <i>Pir</i>        | <i>MGC109484</i>                    | 2.27        | 3.03 | Pirin (iron-binding nuclear protein)                                                                 |
| <i>Slc11a1</i>    | <i>Bcg#Itg#Lsh#MGC124692#Nramp1</i> | 2.06        | 2.92 | Solute carrier family 11 (proton-coupled divalent metal ion transporters), member 1                  |
| <i>Me1</i>        | <i>MOD1</i>                         | 3.75        | 2.66 | Malic enzyme 1, NADP(+)-dependent, cytosolic                                                         |
| <i>Pbld</i>       | <i>MGC93185#Mawbp</i>               | 2.65        | 2.42 | Phenazine biosynthesis-like protein domain-containing                                                |
| <i>Gabrr2</i>     | —                                   | 2.32        | 2.16 | Gamma-aminobutyric acid (GABA) receptor, rho 2                                                       |
| <i>Aldh1a1</i>    | <i>Ahd2#Aldh1#Aldh2</i>             | 3.29        | 2.15 | Aldehyde dehydrogenase 1 family, member A1                                                           |
| <i>Mthfd2</i>     | —                                   | 3.19        | 2.08 | Methylenetetrahydrofolate dehydrogenase (NADP+-dependent) 2, Methenyltetrahydrofolate cyclohydrolase |

PTU, propylthiouracil; MMI, methimazole.
